# Supplementary material for: Binding of oxime group to uranyl ion
Source: Royal Society of Chemistry journal article supplement (doi:10.1039/c6dt01293k), 2016-01-01
Supplement: c6dt01293k1.pdf [file c6dt01293k1.pdf]

## ELECTRONIC SUPPLEMENTARY INFORMATION (ESI)

To

### **Binding of oxime group to uranyl ion: Uranyl complexes with 2-pyridyl ketoximes as ligands**

Sokratis T. Tsantis,<sup>a</sup> Eirini Zagoraïou,<sup>a</sup> Aikaterinh Savvidou,<sup>b</sup> Catherine P. Raptopoulou,<sup>b</sup> Vassilis Psycharis,<sup>b</sup> Lukasz Szyrwił,<sup>c</sup> Małgorzata Hołyńska\*<sup>d</sup> and Spyros P. Perlepes\*<sup>a, e</sup>

This work is dedicated to the loving memory of Malcolm H. Chisholm: A great scientist, a fantastic mentor and a precious friend.

---

<sup>a</sup>Department of Chemistry, University, of Patras, 26504 Patras, Greece. E-mail: [perlepes@patreas.upatras.gr](mailto:perlepes@patreas.upatras.gr); Tel: +30 2610 996730

<sup>b</sup>Institute of Nanoscience and Nanotechnology, NCSR "Demokritos", 153 10 Aghia Paraskevi Attikis, Greece

<sup>c</sup>Department of Chemistry of Drugs, Wrocław Medical University, ul. Borowska 211, 50-556 Wrocław, Poland

<sup>d</sup>Fachbereich Chemie and Wissenschaftliches Zentrum für Materialwissenschaften, Philips-Universität Marburg, Hans-Meerwein-Strasse, D-35043 Marburg, Germany. E-mail: [holynska@staff.uni-marburg.de](mailto:holynska@staff.uni-marburg.de)

<sup>e</sup>Institute of Chemical Engineering Sciences, Foundation for Research and Technology-Hellas (FORTH/ICE-HT), Platani, P.O. Box 1414, 26504 Patras, Greece

---

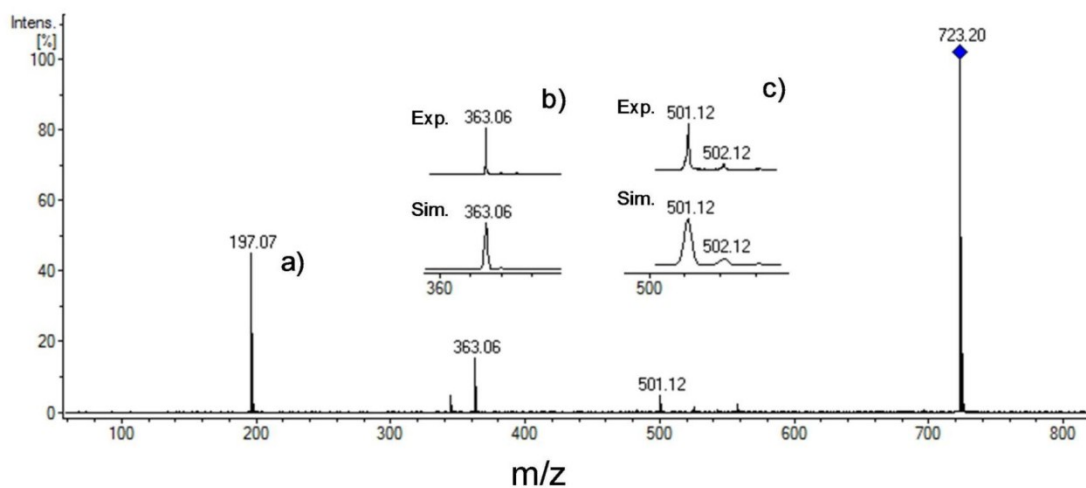

**Fig. S1** Collision-induced fragmentation MS/MS spectra of  $[\text{UO}_2(\text{O}_2\text{CMe})(\text{phpao})_2]^-$  ( $\text{UO}_2\text{C}_{26}\text{H}_{21}\text{N}_4\text{O}_4$ ,  $m/z = 723.20$ ): a) The  $\text{phpao}^-$  signal; b)  $[\text{UO}_2(\text{OH})_2(\text{O}_2\text{CMe})]^-$  ( $\text{UO}_2\text{C}_2\text{H}_5\text{O}_4$ ); c)  $[\text{UO}_2(\text{OH})_2(\text{phpao})]^-$  ( $\text{UO}_2\text{C}_{12}\text{H}_{11}\text{N}_2\text{O}_3$ ).

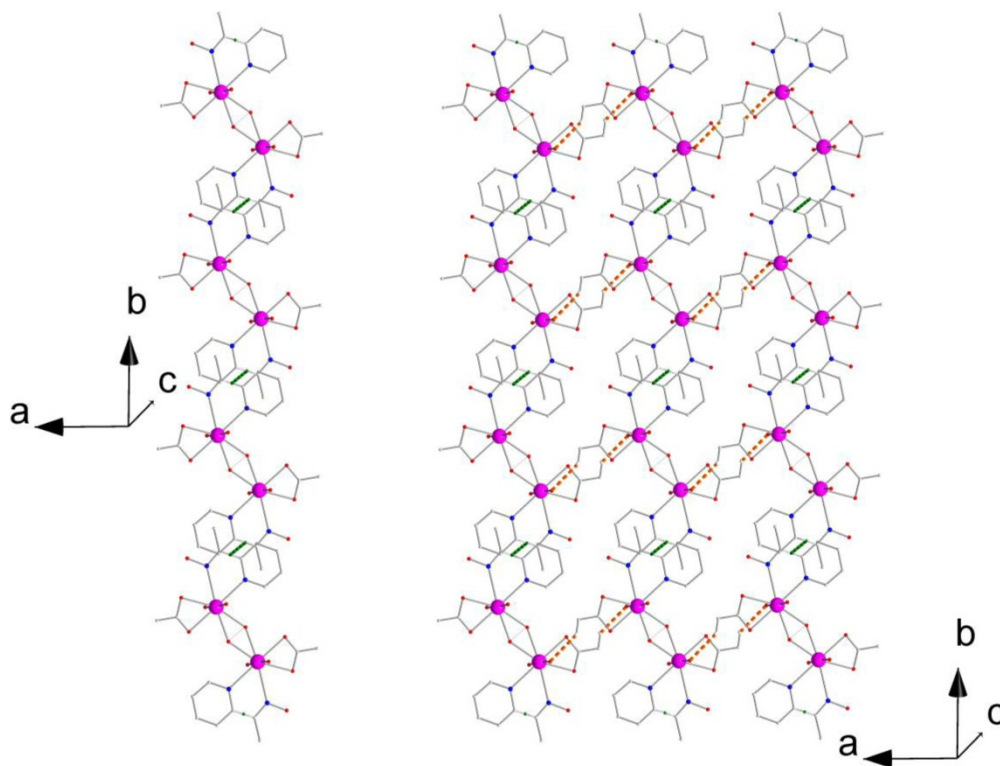

**Fig. S2** Chains (left) along the  $b$  axis and 2D layers (right) parallel to the (001) plane for complex  $[(\text{UO}_2)_2(\text{O}_2)(\text{O}_2\text{CMe})_2(\text{mepaoH})_2]$  (**3**). The dashed dark green and orange lines indicate  $\pi$ - $\pi$  interactions and  $\text{C}_{\text{acetate methyl}}\text{-H}\cdots\text{O}_{\text{uranyl}}$  H bonds.

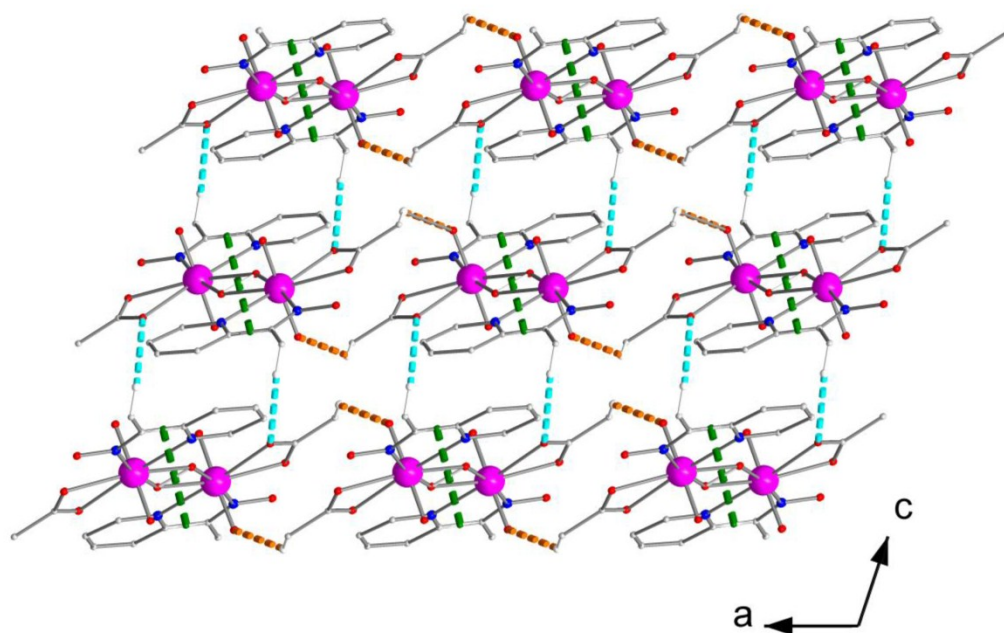

**Fig. S3** A part of the 3D architecture in the crystal structure of complex  $[(\text{UO}_2)_2(\text{O}_2)(\text{O}_2\text{CMe})_2(\text{mepaoH})_2]$  (**3**). The dashed dark green, turquoise and orange lines indicate  $\pi$ - $\pi$  interactions,  $\text{C}_{\text{oxime methyl}}\text{-H}\cdots\text{O}_{\text{coord.acetate}}$  and  $\text{C}_{\text{acetate methyl}}\text{-H}\cdots\text{O}_{\text{uranyl}}$  H bonds, respectively.

**Table S1.** Intermolecular H bonds in the crystal structures of **1-3**

| Interaction D-H $\cdots$ A <sup>a</sup>           | D $\cdots$ A (Å) | H $\cdots$ A (Å) | D-H $\cdots$ A(°) | Symmetry operation for A |
|---------------------------------------------------|------------------|------------------|-------------------|--------------------------|
| <b>Complex 1</b>                                  |                  |                  |                   |                          |
| O6-H(O6) $\cdots$ O11                             | 2.64             | 1.77             | 161.0             | $x, y, z$                |
| <b>Complex 2</b>                                  |                  |                  |                   |                          |
| C1 <sup>b</sup> -H1(C1) $\cdots$ C <sub>g</sub> 1 | 3.680(4)         | 3.17(5)          | 116(2)            | $-x+1, y+1, -z+1$        |
| <b>Complex 3</b>                                  |                  |                  |                   |                          |
| C1 <sup>c</sup> -HB(C1) $\cdots$ O5               | 3.45             | 2.59             | 146.3             | $x, -y+0.5, z+0.5$       |
| C9 <sup>d</sup> -HC(C9) $\cdots$ O3               | 3.28             | 2.55             | 131.9             | $-x+2, -y, -z$           |

<sup>a</sup> D=donor, A=acceptor; <sup>b</sup> C1 is the methyl carbon atom of mepao<sup>-</sup>, not labelled in Fig.4. <sup>c</sup> C1 is the methyl carbon of mepao<sup>-</sup>, not labelled in Fig.6. <sup>d</sup> C9 is the methyl carbon atom of MeCO<sub>2</sub><sup>-</sup>, not labelled in Fig.6.
